# Supplementary material for: Responses of soil N-cycle enzyme activities to vegetation degradation in a wet meadow on the Qinghai-Tibet Plateau
Source: Frontiers journal article supplement (doi:10.3389/fevo.2023.1210643), 2023-08-24
Supplement: Table_1.XLSX [file Table_1.XLSX]

## Sheet: Data
Degradation	Month	Soil depth	urease	protease	nitrate reductase	nitrite reductase	total nitrogen	ammonium nitrogen	nitrate nitrogen	microbial biomass nitrogen
ND	June	0-10cm	0.5739	4.0562	1.3215	0.6057	1.958	5.4817	6.4614	48.6678
ND	June	0-10cm	0.6535	3.5265	2.5857	0.6058	3.4385	5.1312	5.8309	48.6208
ND	June	0-10cm	0.7055	3.2008	2.5125	0.6138	2.7989	5.2722	6.8119	53.4541
LD	June	0-10cm	0.7215	3.5461	3.1495	0.5657	3.4513	6.0414	6.7879	27.6062
LD	June	0-10cm	0.7631	3.5155	2.1741	0.6381	2.8446	5.8566	5.1333	20.7627
LD	June	0-10cm	0.8385	3.1862	2.3024	0.5697	2.4469	5.2961	5.9961	18.5429
MD	June	0-10cm	0.8656	3.2658	3.6519	0.5654	3.2168	5.3874	6.6935	34.926
MD	June	0-10cm	0.8439	3.0968	3.868	0.6037	3.0833	5.4342	6.507	34.5371
MD	June	0-10cm	0.8126	3.1215	2.7895	0.5653	2.3403	4.8279	6.7637	42.4608
HD	June	0-10cm	1.0145	3.5021	5.9052	0.5703	2.1538	3.1026	7.0916	32.2853
HD	June	0-10cm	0.8209	2.9879	6.591	0.5471	3.024	2.9623	7.6973	22.2973
HD	June	0-10cm	1.1466	3.0153	3.571	0.5355	2.1796	4.5718	6.4612	20.401
ND	July	0-10cm	1.4587	6.3259	2.6211	0.6025	1.2589	5.0712	1.5738	107.076
ND	July	0-10cm	1.5584	6.2531	3.4022	0.6102	1.5657	3.6729	4.5474	91.3586
ND	July	0-10cm	1.6561	5.9026	1.6383	0.584	1.6453	6.6442	3.8467	98.4577
LD	July	0-10cm	1.7028	5.2216	2.9346	0.5453	1.9577	3.6724	3.6724	83.066
LD	July	0-10cm	1.5443	5.0259	4.5364	0.5566	2.3329	5.7722	4.0231	92.6907
LD	July	0-10cm	1.415	4.5053	2.4363	0.579	1.5067	4.3737	3.499	73.2142
MD	July	0-10cm	1.4251	4.4564	3.0724	0.5625	2.2805	4.3731	2.0991	68.6095
MD	July	0-10cm	1.3415	4.5465	3.1864	0.5063	1.2771	6.1194	3.322	46.9982
MD	July	0-10cm	1.3517	4.5327	4.1204	0.4909	0.8924	3.1498	1.7499	67.7038
HD	July	0-10cm	1.2847	3.9256	6.0662	0.4856	1.2863	4.0248	2.0999	50.6602
HD	July	0-10cm	1.2745	4.2232	7.0886	0.5063	0.0837	3.6747	3.4997	52.0551
HD	July	0-10cm	1.1511	4.2355	8.1342	0.4909	1.9312	3.3249	4.1998	43.0099
ND	August	0-10cm	1.5064	5.1126	0.9514	0.7476	5	10.1453	1.4868	53.0529
ND	August	0-10cm	1.4924	5.1326	1.4691	0.7426	3.8012	14.5166	1.8364	54.0452
ND	August	0-10cm	1.5779	4.9659	1.2357	0.7533	3.9169	13.1135	1.1365	41.1788
LD	August	0-10cm	1.5627	4.7232	1.5426	0.7213	3.3745	11.3742	3.0623	31.1518
LD	August	0-10cm	1.4961	4.6055	1.3541	0.7262	3.5556	9.2718	2.8865	16.1654
LD	August	0-10cm	1.3931	4.6581	1.6251	0.725	3.6534	9.6237	3.587	20.5462
MD	August	0-10cm	1.6633	4.7765	2.5664	0.6559	2.9073	8.05	7.7875	35.2676
MD	August	0-10cm	1.7291	4.499	2.3102	0.6121	3.219	7.5185	8.1304	36.2873
MD	August	0-10cm	1.6231	4.4256	2.7139	0.6339	3.0586	4.3726	2.5361	45.7115
HD	August	0-10cm	1.8914	3.9988	8.7125	0.5608	2.0975	4.5496	4.4621	34.1827
HD	August	0-10cm	1.7305	3.9365	9.6927	0.5264	2.2355	6.1221	11.807	23.2107
HD	August	0-10cm	1.664	4.2853	9.5626	0.5514	2.1538	5.7725	15.3058	19.7339
ND	September	0-10cm	1.0326	3.5254	3.2097	0.5806	4.885	8.3293	5.0746	45.1467
ND	September	0-10cm	0.8866	3.9351	2.1213	0.591	4.802	9.6575	4.4963	53.6224
ND	September	0-10cm	1.2153	3.1098	3.9513	0.6162	3.84	8.6964	5.0218	56.086
LD	September	0-10cm	1.0191	3.5233	4.2307	0.4906	3.3679	9.777	5.5444	57.9421
LD	September	0-10cm	1.4101	3.0411	2.4867	0.5106	4.764	9.2355	5.4748	63.223
LD	September	0-10cm	1.4522	3.2081	1.616	0.4628	4.6564	9.55	5.3697	50.2957
MD	September	0-10cm	1.2177	3.2516	13.7079	0.4426	2.8014	6.9122	6.6672	46.3302
MD	September	0-10cm	1.3456	3.3366	6.3338	0.4651	2.9335	6.3665	6.0692	41.0249
MD	September	0-10cm	1.4521	3.8521	14.4784	0.4996	3.5948	7.3321	6.4396	44.5361
HD	September	0-10cm	1.0346	2.4058	20.5457	0.3552	0.7951	4.7594	8.8014	44.3229
HD	September	0-10cm	1.3695	3.4913	15.3655	0.3006	2.0744	5.6343	9.8513	38.1731
HD	September	0-10cm	1.5139	4.4931	22.9624	0.2822	1.9712	4.3561	9.4119	21.2875
ND	June	10-20cm	0.5427	2.8121	2.0213	0.5426	3.7762	4.9685	6.9512	44.7919
ND	June	10-20cm	0.6305	3.1203	3.4252	0.5653	3.1204	5.4574	5.3174	44.9795
ND	June	10-20cm	0.5414	2.9525	2.3291	0.5601	3.3566	4.8279	5.9241	33.1665
LD	June	10-20cm	0.7235	2.6484	2.1173	0.5906	2.1818	4.9687	6.9282	17.9097
LD	June	10-20cm	1.0021	2.8694	3.0615	0.5658	3.4269	5.7135	7.3925	16.8285
LD	June	10-20cm	0.8824	2.8625	2.2716	0.5746	2.5125	5.9959	6.5792	17.428
MD	June	10-20cm	0.8706	3.0251	3.1057	0.5857	3.5104	3.7561	7.2556	24.0695
MD	June	10-20cm	0.722	2.7734	4.0279	0.5602	2.5303	3.4052	6.997	37.1264
MD	June	10-20cm	0.8873	2.4527	3.6702	0.5402	2.396	4.4545	6.95	32.0493
HD	June	10-20cm	1.0561	2.4042	6.4966	0.5367	2.3984	3.5688	7.744	30.6844
HD	June	10-20cm	0.9207	2.8216	5.0481	0.5603	2.4263	2.9865	6.533	18.2023
HD	June	10-20cm	1.1832	2.6422	5.473	0.5092	2.4615	3.7552	7.0906	10.4843
ND	July	10-20cm	1.0927	3.8946	3.7215	0.548	2.3708	5.0726	4.3729	50
ND	July	10-20cm	1.4222	4.1209	4.1964	0.4963	3.1354	3.1479	5.4214	86.5006
ND	July	10-20cm	1.3505	4.6941	4.0211	0.5121	3.8893	4.3736	3.3239	73.1859
LD	July	10-20cm	1.0125	3.651	5.4626	0.5582	2.2735	2.6235	3.6728	48.2642
LD	July	10-20cm	1.2556	3.4552	4.2561	0.5406	1.5616	4.1989	3.4991	61.7405
LD	July	10-20cm	1.3545	3.9815	3.2169	0.5991	2.141	3.3231	6.4713	56.6474
MD	July	10-20cm	1.1451	3.6	4.0266	0.537	3.4589	2.6249	4.0248	42.4098
MD	July	10-20cm	1.2624	3.1216	5.6571	0.5504	3.1411	3.1498	2.7998	49.1932
MD	July	10-20cm	1.3757	2.987	5.0627	0.4469	2.8742	2.2742	4.8983	50.8863
HD	July	10-20cm	1.1245	3.1327	4.993	0.4856	0.5553	1.3992	5.9468	29.3166
HD	July	10-20cm	1.3765	2.8261	6.3623	0.4786	0.4468	3.3248	4.3747	61.025
HD	July	10-20cm	1.0953	3.3979	6.2411	0.5019	0.6139	2.6247	8.7491	56.364
ND	August	10-20cm	1.4866	3.6841	2.76	0.6217	3.0785	9.0927	1.1366	29.2094
ND	August	10-20cm	1.3824	3.953	1.4556	0.6656	2.7407	5.0742	0.9623	41.8112
ND	August	10-20cm	1.2568	4.2625	1.8251	0.7135	3.6364	4.3711	0.7868	30.8583
LD	August	10-20cm	1.5365	3.7258	3.1303	0.7067	2.8333	6.1191	0.6119	16.7715
LD	August	10-20cm	1.4884	3.6546	3.6289	0.6015	3.304	5.9477	2.3616	18.0106
LD	August	10-20cm	1.3264	3.8555	3.8956	0.6265	2.7133	7.8682	5.3329	20.9004
MD	August	10-20cm	1.4142	4.0255	4.2356	0.6256	2.7916	5.0743	8.1364	11.4148
MD	August	10-20cm	1.5642	3.3617	5.117	0.5756	2.1111	9.4448	11.1064	38.2442
MD	August	10-20cm	1.5952	3.2157	4.5698	0.5886	2.3889	3.3223	6.5571	18.3831
HD	August	10-20cm	1.6429	3.7564	6.9517	0.5769	1.9483	2.9733	4.285	27.3573
HD	August	10-20cm	1.5464	2.9596	8.011	0.5886	2.0576	8.5687	13.2029	20.6177
HD	August	10-20cm	1.6798	3.0919	6.3663	0.5929	1.8648	7.6965	11.4573	11.8129
ND	September	10-20cm	0.8299	3.2371	5.0294	0.5206	5.4987	7.4502	5.2466	37.0299
ND	September	10-20cm	1.0222	4.322	10.6209	0.5629	4.4579	7.8009	5.4221	51.4749
ND	September	10-20cm	0.9013	2.8156	4.7572	0.5501	5.1095	8.1514	4.2506	51.775
LD	September	10-20cm	0.9844	3.2172	7.1025	0.4012	3.5812	7.6772	5.4213	45.5826
LD	September	10-20cm	0.9102	3.5981	7.0246	0.4839	3.5689	7.2063	6.1744	30.2386
LD	September	10-20cm	0.9238	2.4642	6.8775	0.4663	2.7978	7.5203	5.8938	39.2535
MD	September	10-20cm	1.0658	3.2985	8.107	0.4296	2.7541	6.2295	6.387	44.6333
MD	September	10-20cm	1.2525	3.7252	7.9695	0.4026	2.1396	4.1989	7.1381	43.5353
MD	September	10-20cm	1.2569	2.7206	7.8685	0.4333	2.3821	5.0392	6.5965	32.1885
HD	September	10-20cm	1.3929	3.2752	16.4503	0.2927	3.2442	3.5865	10.8296	27.8664
HD	September	10-20cm	1.2596	2.7156	16.3965	0.3322	2.2464	3.3598	10.5519	25.5105
HD	September	10-20cm	1.1065	3.3599	24.1237	0.3515	3.5321	2.9222	10.3241	27.6567
ND	June	20-40cm	0.5722	2.6855	3.1755	0.5368	3.2662	4.759	5.5988	32.4227
ND	June	20-40cm	0.5836	2.4124	2.9661	0.561	2.5632	4.2692	7.1853	23.9615
ND	June	20-40cm	0.4592	2.8631	3.1425	0.5427	2.6944	4.4331	7.023	11.5847
LD	June	20-40cm	0.694	2.7813	3.0567	0.5023	2.3776	4.7577	7.9062	24.2247
LD	June	20-40cm	0.8625	2.9686	4.2515	0.5702	2.3588	4.8517	7.7208	10.5764
LD	June	20-40cm	0.7795	2.1625	2.6384	0.4956	1.8593	4.479	8.2349	15.8437
MD	June	20-40cm	0.7048	2.6825	4.2327	0.5456	1.7256	3.0787	8.4898	20.2214
MD	June	20-40cm	0.8858	2.1065	5.0158	0.5063	1.8704	3.685	7.4867	17.1848
MD	June	20-40cm	0.7846	2.8457	3.8955	0.538	2.2755	3.5922	7.7676	14.0363
HD	June	20-40cm	1.0453	2.3126	4.5206	0.5327	3.204	2.4031	7.4194	13.585
HD	June	20-40cm	0.9918	2.0845	5.6606	0.5027	2.8975	2.4958	7.6972	10.3506
HD	June	20-40cm	0.9415	2.2856	5.5303	0.4675	3.219	2.2862	8.935	13.1537
ND	July	20-40cm	0.9208	4.0222	4.0245	0.4121	3.454	2.7989	3.6736	42.4019
ND	July	20-40cm	0.9325	3.9021	4.2421	0.4566	3.7714	4.3737	3.324	36.3038
ND	July	20-40cm	1.2137	4.0219	4.1096	0.4856	2.0026	6.8183	5.7693	57.8309
LD	July	20-40cm	1.1003	3.6236	4.9515	0.4653	1.3052	2.9726	5.0709	39.7898
LD	July	20-40cm	0.9533	3.4525	4.5268	0.569	1.6785	3.4967	4.196	47.4005
LD	July	20-40cm	0.7459	3.3523	3.9606	0.4453	1.4164	3.8468	5.2456	68.4703
MD	July	20-40cm	0.979	3.2222	8.0376	0.4102	3.3628	1.9246	3.3242	55.5512
MD	July	20-40cm	1.0851	2.8628	6.3651	0.425	2.5192	2.973	5.2464	32.9263
MD	July	20-40cm	1.1632	3.8655	6.3105	0.4203	2.5399	3.4985	5.5976	36.7367
HD	July	20-40cm	1.0256	3.0335	5.1256	0.4427	1.1182	2.2748	6.9994	46.2561
HD	July	20-40cm	1.1585	2.7174	5.0501	0.3958	2.352	1.5749	4.7246	25.7403
HD	July	20-40cm	1.0575	2.8583	4.3956	0.4257	2.4309	2.7998	5.5996	31.5687
ND	August	20-40cm	1.1806	3.3701	2.3326	0.5625	2.5175	5.5952	4.109	30.2799
ND	August	20-40cm	1.0156	3.0588	2.8531	0.5658	2.6872	7.5194	3.5848	24.9066
ND	August	20-40cm	0.8962	3.208	2.6587	0.5553	2.9097	6.2945	2.7101	10.1159
LD	August	20-40cm	1.308	3.2625	3.3453	0.5538	2.4796	6.1207	3.585	25.8241
LD	August	20-40cm	1.2625	2.725	4.254	0.5581	2.7778	8.0465	5.3352	11.929
LD	August	20-40cm	1.1579	2.8464	3.789	0.4998	2.2378	4.3722	1.8363	18.333
MD	August	20-40cm	1.4956	2.8729	5.3425	0.5562	1.5815	2.2744	7.9603	21.7945
MD	August	20-40cm	1.2685	2.834	5.8953	0.5024	2.0637	4.1995	7.4367	19.9178
MD	August	20-40cm	1.3366	2.9855	6.9812	0.4879	1.8425	4.0222	9.5308	16.7047
HD	August	20-40cm	1.558	2.6124	6.4257	0.5423	2.0413	2.4493	10.2346	16.2443
HD	August	20-40cm	1.3692	2.0153	6.5203	0.5232	1.9019	3.3249	11.8123	14.6722
HD	August	20-40cm	1.4219	2.3979	6.3652	0.4818	2.006	2.2747	11.1109	17.4254
ND	September	20-40cm	0.7527	2.9891	2.4638	0.4156	3.3472	4.8116	5.2491	47.5794
ND	September	20-40cm	0.9143	3.0257	4.9987	0.4484	2.6426	6.7158	5.3516	45.5803
ND	September	20-40cm	0.8323	3.2058	8.2055	0.4079	2.8931	5.3534	5.196	41.592
LD	September	20-40cm	1.0952	2.8157	3.7876	0.4087	3.2031	7.3286	7.2237	37.9411
LD	September	20-40cm	1.1043	2.8593	19.5975	0.3956	4.0889	5.0575	6.09	33.8877
LD	September	20-40cm	1.0567	2.9825	16.5024	0.4332	3.1472	5.2487	5.3537	30.5744
MD	September	20-40cm	1.1041	3.1525	20.5106	0.3978	1.7995	4.8117	7.7512	37.5856
MD	September	20-40cm	1.1553	3.0069	11.6426	0.384	2.3554	4.4781	9.6035	36.0998
MD	September	20-40cm	1.1023	2.9427	10.8139	0.3725	2.1678	4.1453	8.8854	31.8452
HD	September	20-40cm	1.0513	3.0301	24.6376	0.4084	0.9876	2.6949	8.8898	20.7456
HD	September	20-40cm	1.2554	2.8384	19.9865	0.3953	1.8006	3.7797	10.3241	16.1073
HD	September	20-40cm	1.1527	2.6526	28.2055	0.3455	0.9599	3.3942	11.3374	14.1498
ND	June	0-40cm	0.5629	3.1846	2.1728	0.5617	3.0002	5.0697	6.3371	41.9608
ND	June	0-40cm	0.6225	3.0197	2.9923	0.5773	3.0407	4.9526	6.1112	39.1872
ND	June	0-40cm	0.5687	3.0055	2.6613	0.5722	2.95	4.8444	6.5863	32.7351
LD	June	0-40cm	0.713	2.992	2.7745	0.5529	2.6702	5.256	7.2074	23.2469
LD	June	0-40cm	0.8759	3.1178	3.1624	0.5914	2.8768	5.4739	6.7489	16.0558
LD	June	0-40cm	0.8335	2.7371	2.4041	0.5466	2.2729	5.257	6.9367	17.2715
MD	June	0-40cm	0.8137	2.9912	3.6634	0.5656	2.8176	4.0741	7.4796	26.4056
MD	June	0-40cm	0.8173	2.6589	4.3039	0.5567	2.4947	4.1748	6.9969	29.6161
MD	June	0-40cm	0.8281	2.8066	3.4517	0.5478	2.3373	4.2915	7.1604	29.5155
HD	June	0-40cm	1.0386	2.7397	5.6408	0.5466	2.5854	3.0248	7.4183	25.5182
HD	June	0-40cm	0.9111	2.6313	5.7665	0.5367	2.7826	2.8149	7.3092	16.9501
HD	June	0-40cm	1.0904	2.6477	4.8581	0.5041	2.6201	3.5378	7.4956	14.6796
ND	July	0-40cm	1.1574	4.7476	3.4557	0.5209	2.3612	4.3142	3.2068	66.4925
ND	July	0-40cm	1.3044	4.7587	3.9469	0.521	2.8241	3.7315	4.4309	71.3877
ND	July	0-40cm	1.4068	4.8729	3.2563	0.5273	2.5124	5.9454	4.3133	76.4915
LD	July	0-40cm	1.2719	4.1654	4.4496	0.5229	1.8454	3.0895	4.1387	57.04
LD	July	0-40cm	1.2511	3.9779	4.4398	0.5554	1.8577	4.4893	3.906	67.2772
LD	July	0-40cm	1.1718	3.9464	3.2046	0.5411	1.688	3.8479	5.072	66.1106
MD	July	0-40cm	1.1831	3.7595	5.0455	0.5032	3.034	2.9742	3.1494	55.5235
MD	July	0-40cm	1.2297	3.5103	5.0695	0.4939	2.3125	4.0807	3.7894	43.0392
MD	July	0-40cm	1.2968	3.7951	5.1645	0.4527	2.1022	2.9742	4.0819	51.7756
HD	July	0-40cm	1.145	3.3639	5.3949	0.4713	0.9866	2.5663	5.0154	42.0776
HD	July	0-40cm	1.2698	3.2556	6.167	0.4602	0.9609	2.8581	4.1997	46.2735
HD	July	0-40cm	1.1013	3.4972	6.257	0.4728	1.6587	2.9165	6.1829	43.6476
ND	August	0-40cm	1.3912	4.0556	2.0146	0.6423	3.532	8.2778	2.2441	37.5141
ND	August	0-40cm	1.2968	4.0481	1.9259	0.6596	3.0764	9.0367	2.1279	40.2543
ND	August	0-40cm	1.2437	4.1454	1.9065	0.6741	3.4876	7.9263	1.5445	27.3844
LD	August	0-40cm	1.4691	3.9038	2.6727	0.6606	2.8958	7.8713	2.4197	24.5825
LD	August	0-40cm	1.4157	3.6617	3.079	0.6286	3.2124	7.7553	3.5278	15.3683
LD	August	0-40cm	1.2925	3.7867	3.1032	0.6171	2.8681	7.288	3.5854	19.9266
MD	August	0-40cm	1.5244	3.8916	4.0482	0.6126	2.4268	5.1329	7.9614	22.8256
MD	August	0-40cm	1.5206	3.5649	4.4409	0.5634	2.4646	7.0543	8.8912	31.4831
MD	August	0-40cm	1.5183	3.5423	4.755	0.5701	2.43	3.9057	6.208	26.9331
HD	August	0-40cm	1.6974	3.4559	7.3633	0.56	2.029	3.3241	6.3273	25.9281
HD	August	0-40cm	1.5487	2.9705	8.0747	0.5461	2.065	6.0053	12.274	19.5002
HD	August	0-40cm	1.5886	3.2583	7.4314	0.542	2.0082	5.2479	12.6247	16.3241
ND	September	0-40cm	0.8717	3.2505	3.5676	0.5056	4.577	6.8637	5.1901	43.252
ND	September	0-40cm	0.941	3.761	5.9136	0.5341	3.9675	8.058	5.09	50.2259
ND	September	0-40cm	0.983	3.0438	5.638	0.5247	3.9475	7.4004	4.8228	49.8177
LD	September	0-40cm	1.0329	3.1854	5.0403	0.4335	3.3841	8.2609	6.0631	47.1553
LD	September	0-40cm	1.1415	3.1662	9.7029	0.4634	4.1406	7.1664	5.9131	42.4498
LD	September	0-40cm	1.1442	2.885	8.332	0.4541	3.5338	7.4397	5.5391	40.0412
MD	September	0-40cm	1.1292	3.2342	14.1085	0.4233	2.4517	5.9844	6.9351	42.8497
MD	September	0-40cm	1.2512	3.3562	8.6486	0.4172	2.4762	5.0145	7.6036	40.22
MD	September	0-40cm	1.2704	3.1718	11.0536	0.4351	2.7149	5.5055	7.3072	36.1899
HD	September	0-40cm	1.1596	2.9037	20.5445	0.3521	1.6756	3.6803	9.5069	30.9783
HD	September	0-40cm	1.2949	3.0151	17.2495	0.3427	2.0404	4.2579	10.2424	26.597
HD	September	0-40cm	1.2577	3.5018	25.0972	0.3264	2.1544	3.5575	10.3578	21.0313

## Sheet: Soil temperature
	0-10 cm				10-20 cm				20-40 cm
Date	ND	SD	MD	HD	ND	SD	MD	HD	ND	SD	MD	HD
2020-06-20	10.125	12.9229	13.2069	15.974	8.10208	11.2071	11.6125	12.2712	9.31364	9.51714	9.77083	10.5507
2020-06-21	9.83333	12.3806	12.6819	13.1201	8.10208	11.5549	11.9806	12.2708	9.86111	10.0146	10.2861	11.0875
2020-06-22	9.36667	11.4306	11.7167	11.9174	7.91875	11.0632	11.45	11.575	9.89792	10.1653	10.3014	10.8375
2020-06-23	9.7625	10.8833	11.216	11.5493	7.89792	10.5931	10.9597	11.0646	9.67778	9.95556	10.0326	10.4715
2020-06-24	10.2604	11.1257	11.2618	11.7715	8.50417	10.6062	10.8535	10.9729	9.56806	9.86111	9.87569	10.2924
2020-06-25	9.62708	11.8799	11.7562	12.2375	8.33958	11.1285	11.2076	11.4299	9.8	10.0611	10.0132	10.566
2020-06-26	9.94792	11.4368	11.6021	11.7312	8.3875	11.1917	11.3681	11.4465	10.1097	10.3944	10.2778	10.7056
2020-06-27	10.4479	11.4132	11.4299	12.375	8.70833	10.8972	10.9986	11.2326	10.0146	10.2431	10.0583	10.475
2020-06-28	10.7438	12.6632	12.6701	14.2444	9.03125	11.6639	11.7903	12.3	10.3354	10.5104	10.375	11.0507
2020-06-29	10.5271	13.0417	13.0062	14.2396	9.05833	12.3028	12.3535	12.9868	10.8757	11.0201	10.8965	11.7326
2020-06-30	10.2729	13.1062	12.9903	14.1292	8.98542	12.4576	12.4479	13.1958	11.1271	11.2465	11.1021	12.0146
2020-07-01	10.475	12.5139	12.6132	13.5993	9.11042	12.1667	12.2667	12.7535	11.2049	11.4062	11.1819	11.8681
2020-07-02	10.8333	13.0458	12.8361	13.5785	9.32708	12.3542	12.2896	12.75	11.2035	11.4111	11.1465	11.8417
2020-07-03	10.2333	12.7	12.8097	12.741	9.24583	12.4861	12.5326	12.7285	11.4507	11.6014	11.3618	11.9486
2020-07-04	10.55	12.1507	12.1667	12.5451	9.10417	11.8639	11.9375	12.0924	11.1562	11.3417	11.1007	11.4972
2020-07-05	11.1229	12.1188	12.0618	12.2778	9.47292	11.8701	11.9049	12.1299	11.0271	11.2694	11.0312	11.5021
2020-07-06	11.3292	11.9049	11.6799	12.2063	9.64167	11.5243	11.4903	11.6583	10.7451	11.0875	10.7826	11.1319
2020-07-07	11.3854	12.9653	12.9333	14.9229	9.85833	12.0979	12.1528	12.8063	10.9299	11.1736	10.9465	11.5792
2020-07-08	11.5208	13.6951	13.7382	15.1757	9.91042	12.934	13.0299	13.8722	11.559	11.6382	11.5167	12.5076
2020-07-09	11.35	13.2993	13.4153	13.9847	10.05	12.8944	12.991	13.5431	11.7625	11.916	11.7438	12.5882
2020-07-10	10.8021	12.5764	12.7257	12.7111	9.87708	12.4319	12.6132	12.8229	11.6674	11.8368	11.675	12.2188
2020-07-11	10.35	12.0722	12.0556	12.3326	9.49167	11.959	12.0382	12.2278	11.3375	11.6076	11.3653	11.7542
2020-07-12	10.6	11.9444	11.8854	12.6097	9.53542	11.6958	11.7292	11.9451	11.0222	11.3875	11.0993	11.4403
2020-07-13	10.8438	12.6562	12.559	13.3257	9.58542	12.1979	12.2111	12.6715	11.1361	11.4812	11.2347	11.8139
2020-07-14	11.3792	12.6847	12.666	13.8743	9.95417	12.2826	12.3201	12.8174	11.2715	11.6139	11.3562	11.9028
2020-07-15	11.3479	13.2507	13.0924	14.8562	9.99167	12.6264	12.5687	13.3812	11.409	11.7757	11.4694	12.241
2020-07-16	11.2708	13.4951	13.3111	14.1778	10.0813	13.0271	12.9236	13.6639	11.6875	12.0597	11.7722	12.6799
2020-07-17	11.2521	13.4389	13.0944	15.4611	10.1271	12.834	12.6389	13.6076	11.6139	12.0299	11.6806	12.4965
2020-07-18	11.1958	13.309	12.9431	13.3375	10.0458	13.1479	12.9521	13.8167	11.8896	12.3549	11.9771	13.0292
2020-07-19	11.5896	12.4111	12.116	13.2903	10.2354	12.3042	12.0799	12.5993	11.7294	12.0674	11.5757	12.0931
2020-07-20	11.8	12.3556	12.3535	11.8924	10.3729	12.3819	12.359	12.7076	10.0813	11.9632	11.6035	12.2458
2020-07-21	12.2229	11.9611	11.9097	12.7972	10.6333	11.8194	11.8465	12.2243	10.1271	11.6694	11.3319	11.7236
2020-07-22	12.5687	12.5167	12.5472	14.2611	10.8688	12.0764	12.1479	12.9889	10.0458	11.5778	11.3438	12.0431
2020-07-23	12.5312	13.0986	13.2812	14.1118	11.1146	12.6667	12.8451	13.6354	10.2354	11.8493	11.7361	12.659
2020-07-24	12.2646	13.25	13.2292	14.3569	11.0104	12.7792	12.8438	13.5806	10.3729	11.9951	11.8139	12.6583
2020-07-25	12.3271	12.8653	12.7903	13.2222	11.0979	12.6722	12.8257	13.2569	10.6333	12.1528	12.066	12.7646
2020-07-26	11.8938	12.7215	12.3938	13.5014	11.1188	12.4819	12.3583	12.9611	10.8688	12.0986	11.7931	12.4014
2020-07-27	11.1167	12.7333	12.4722	13.6118	10.6562	12.4799	12.3333	13.159	11.1146	12.0111	11.7021	12.4847
2020-07-28	10.8833	12.8993	12.9396	14.1458	10.3854	12.5951	12.6646	13.5194	11.0104	11.9771	11.7944	12.6875
2020-07-29	10.5354	12.6681	12.9424	13.7569	10.1042	12.4354	12.741	13.5056	11.0979	11.9465	11.9	12.7764
2020-07-30	10.4604	12.6806	12.9833	14.4229	9.9375	12.2917	12.6917	13.4903	11.1188	11.8132	11.8681	12.6674
2020-07-31	10.6542	13.1118	13.2056	14.5465	9.95625	12.6333	12.884	13.8021	10.6562	11.8889	11.9618	12.9007
2020-08-01	10.9083	12.9132	12.9187	14.0653	10.0458	12.5938	12.8382	13.7181	10.3854	11.9479	12.0549	12.9528
2020-08-02	11.1667	12.6653	12.6611	14.3389	10.1708	12.3403	12.5139	13.4882	10.1042	11.8181	11.8972	12.7139
2020-08-03	11.3958	13.0243	13.3979	14.7257	10.3833	12.6069	13.0167	14.0764	9.9375	11.8868	12.0465	13.1104
2020-08-04	10.9042	13.1861	13.5424	15.2625	10.3021	12.6271	13.1931	14.2139	11.2229	11.9	12.2812	13.2326
2020-08-05	10.7146	13.9847	14.1632	16.3444	10.0958	13.1521	13.5951	14.8785	11.6306	12.0875	12.4812	13.6819
2020-08-06	10.625	14.7583	14.6396	16.2937	10.0875	13.7368	14.0444	15.3944	11.1493	12.4368	12.7625	14.2208
2020-08-07	10.5854	15.1104	14.6104	16.4563	9.92083	14.0646	14.1201	15.3681	10.934	12.7528	12.9618	14.3014
2020-08-08	11.3229	15.909	14.4708	16.2931	10.2688	14.6646	14.1007	15.4021	10.709	13.1132	13.0389	14.4014
2020-08-09	11.55	16.0792	13.8833	15.4854	10.425	14.9667	13.7729	14.9611	10.3639	13.4618	12.9694	14.1903
2020-08-10	11.4958	16.0493	13.6847	14.7347	10.7021	15.0924	13.5479	14.5722	9.98958	13.6562	12.8035	13.9181
2020-08-11	10.8688	15.4371	13.7897	14.2461	10.3333	14.6686	13.6368	14.4513	10.1368	13.65	12.8809	13.7371
2020-08-12	10.7812	15.3417	13.7201	15.3826	10.2792	14.5944	13.5819	14.5861	10.5882	13.5569	12.8347	13.7812
2020-08-13	10.3562	15.7063	13.7438	15.7201	9.97083	14.7528	13.4847	14.75	10.7812	13.5819	12.7528	13.8264
2020-08-14	10.6438	15.8778	13.9917	14.7222	9.9875	15.066	13.7708	14.7319	10.9	13.8431	12.8764	14.0382
2020-08-15	10.8292	14.9347	13.4042	13.4681	10.1146	14.5493	13.4451	13.9847	11.1583	13.7667	12.8125	13.5896
2020-08-16	11.4187	13.6736	12.625	12.7167	10.3271	13.7042	12.8278	13.0563	11.066	13.3618	12.5097	12.8861
2020-08-17	11.6242	12.7812	11.5312	10.7743	10.6242	13.041	12.2278	12.2736	10.8167	12.9368	12.2188	12.4069
2020-08-18	12.6909	11.9799	10.8007	12.0153	11.1	12.0271	11.2472	11.4625	10.5222	12.3236	11.5417	11.3917
2020-08-19	12.1312	13.684	11.8562	13.7632	11.2167	12.9035	11.8076	12.7688	10.3271	12.2535	11.4618	12
2020-08-20	11.9896	14.7826	12.5118	14.2014	11.0938	13.7493	12.291	13.4354	10.6242	12.6306	11.6674	12.5514
2020-08-21	11.9896	15.1694	12.9382	14.8208	11.2	14.1625	12.6451	13.7451	11.1	12.991	11.8917	12.8181
2020-08-22	11.8375	15.6611	13.5278	15.1299	11.2083	14.6604	13.1382	14.4007	11.2167	13.3187	12.1819	13.3479
2020-08-23	11.0062	14.8389	13.041	13.2514	10.8542	14.3812	13.0361	13.7167	11.0938	13.459	12.3333	13.1979
2020-08-24	10.9792	13.7875	12.1813	13.6306	10.5729	13.5521	12.3646	12.9715	11.2	13.1556	12.0444	12.5181
2020-08-25	11.0958	14.1236	11.8465	13.2736	10.5958	13.6208	12.1146	13.0222	11.2083	12.984	11.841	12.5222
2020-08-26	10.9917	13.9708	11.534	13.1903	10.5625	13.5201	11.8194	12.8201	10.8542	12.9181	11.6458	12.3368
2020-08-27	10.1854	13.8201	11.5403	13.2049	10.2375	13.3792	11.7299	12.8694	10.5729	12.8174	11.5056	12.316
2020-08-28	10.2562	14.1062	12.2118	14.3931	10.0125	13.441	12.075	13.3951	10.5958	12.7458	11.5479	12.5236
2020-08-29	10.1375	13.6535	12.5785	12.8868	9.95417	13.4285	12.4632	13.3153	10.5625	12.8021	11.7819	12.7611
2020-08-30	10.4583	12.4958	11.5965	11.7042	9.925	12.6035	11.9896	12.2292	10.2375	12.5139	11.8007	12.1111
2020-08-31	10.6958	12.5236	11.3778	13.0354	10.1	12.2847	11.5451	12.2	10.0125	12.2	11.4174	11.741
2020-09-01	10.4521	13.7014	12.0646	14.3507	10.0375	12.9611	11.9639	13.2688	9.95417	12.2549	11.4618	12.3472
2020-09-02	10.6875	14.1528	12.1139	14.5486	10.1229	13.4076	12.0563	13.4653	9.925	12.5493	11.5549	12.5951
2020-09-03	10.7708	14.3618	12.3278	14.7743	10.225	13.6292	12.2306	13.759	10.1	12.725	11.6486	12.841
2020-09-04	10.2208	14.2785	12.3493	14.8993	10.0208	13.6326	12.2951	13.9	10.0375	12.8278	11.7431	12.9965
2020-09-05	10.1	13.891	12.2139	13.066	9.92083	13.5646	12.3368	13.575	10.1229	12.8583	11.7986	13.0472
2020-09-06	9.31667	12.5854	11.3535	12.5764	9.55625	12.6549	11.6743	12.4708	10.225	12.5597	11.5451	12.2271
2020-09-07	8.95208	12.7111	11.7944	13.6472	9.19792	12.5604	11.8097	13.0076	10.0208	12.3208	11.4333	12.3389
2020-09-08	8.55	12.559	12.0875	12.8319	8.94167	12.5174	12.0674	12.9882	9.92083	12.266	11.5556	12.4799
2020-09-09	8.325	12.3778	12.1049	13.725	8.68958	12.2458	12.0354	12.9431	9.55625	12.0813	11.5583	12.3007
2020-09-10	8.34167	12.2819	11.7618	12.2403	8.54375	12.2722	11.9229	12.6618	9.19792	12.0646	11.55	12.2806
2020-09-11	8.48542	11.7174	11.3063	12.0687	8.56042	11.8076	11.5556	12.0514	8.94167	11.8562	11.3493	11.8104
2020-09-12	8.66875	11.5639	11.3285	11.9437	8.59167	11.6208	11.4931	12.1646	8.68958	11.6569	11.2479	11.8076
2020-09-13	9.08333	11.2347	11.05	11.8965	8.76667	11.3076	11.2847	11.834	8.54375	11.4375	11.1104	11.5528
2020-09-14	9.32708	11.1069	10.8438	11.5118	9.06042	11.1785	11.1014	11.7069	8.56042	11.2632	10.9528	11.4437
2020-09-15	9.125	10.9535	10.7833	12.2007	9.05833	10.9465	10.9674	11.716	8.59167	11.0875	10.8208	11.3049
2020-09-16	9.325	11.0549	11.1486	11.6375	9.06667	11.0625	11.2514	11.9431	8.76667	11.0514	10.8903	11.5431
2020-09-17	9.18125	10.6438	10.4333	11.5986	9.08958	10.7201	10.85	11.4292	9.06042	10.8861	10.7847	11.1854
2020-09-18	8.73333	10.2875	9.97222	11.3653	8.84167	10.4896	10.4076	11.2986	9.05833	10.6965	10.5146	11.0563
2020-09-19	8.05208	10.459	10.5062	12.4667	8.45833	10.4049	10.609	11.7285	9.06667	10.5236	10.4444	11.1764
2020-09-20	7.31458	11.3701	11.4826	14.3931	8.0125	10.9403	11.2229	12.8361	9.08958	10.6431	10.659	11.7549
2020-09-21	6.87917	11.5083	11.6368	12.459	7.60833	11.3035	11.6306	12.7965	8.84167	10.8875	10.9917	12.1444
2020-09-22	7.29375	11.0097	10.9153	12.6028	7.55833	10.8903	11.1493	12.0222	8.45833	10.8417	10.9028	11.6076
2020-09-23	7.24792	10.909	10.6806	12.7861	7.57708	10.8556	10.934	12.2514	8.0125	10.7646	10.7604	11.6562
2020-09-24	7.61042	10.1438	10.2556	10.2549	7.56875	10.4549	10.709	11.5368	7.60833	10.6403	10.6528	11.5
2020-09-25	8.1875	9.72083	10.0194	10.1243	7.85417	9.93194	10.3639	10.8215	7.55833	10.2417	10.384	10.8493
2020-09-26	8.40417	9.26736	9.57292	9.72917	8.13125	9.60417	9.98958	10.2833	7.57708	9.95278	10.1278	10.3896
2020-09-27	8.02083	9.46528	10.0528	11.2403	8.07708	9.55556	10.1368	10.7	7.56875	9.75417	10	10.3903
2020-09-28	7.45833	10.1472	10.6153	11.8208	7.78125	9.95347	10.5882	11.3444	7.85417	9.86667	10.1806	10.816
2020-09-29	6.78333	10.459	10.8333	12.2875	7.43542	10.2354	10.7812	11.6271	8.13125	9.99444	10.3111	11.0424
2020-09-30	6.67708	10.4993	10.9299	12.7743	7.16667	10.2972	10.9	11.8653	8.07708	10.1236	10.4694	11.2181
2020-10-01	6.74167	10.8965	11.2222	13.0049	7.11875	10.6049	11.1583	12.3486	7.78125	10.291	10.6076	11.5965
2020-10-02	6.73125	10.6076	10.8736	12.075	7.04167	10.5271	11.066	12.0639	7.43542	10.366	10.7	11.6056
2020-10-03	7.70208	10.2333	10.5854	11.2771	7.35625	10.2799	10.8167	11.6764	9.13403	10.2729	10.5639	11.3875
2020-10-04	7.91042	9.64722	10.2382	10.9431	7.69583	9.875	10.5222	11.1333	8.92431	10.0368	10.4139	10.9965
2020-10-05	7.79375	9.37847	9.83611	10.4479	7.6375	9.625	10.2299	10.9014	9.12014	9.82708	10.225	10.8049
2020-10-06	8.11875	9.13194	9.48125	9.83542	7.85625	9.40486	9.91806	10.4437	8.83333	9.65903	10.0125	10.4646
2020-10-07	8.08958	8.92431	9.17361	9.94444	7.87292	9.15833	9.56458	10.1569	8.81111	9.49861	9.71736	10.1069
2020-10-08	7.89792	9.11597	9.42083	9.60694	7.82917	9.24583	9.70903	10.2042	8.87257	9.4	9.67083	10.1069
2020-10-09	8.06042	8.82708	9.00278	8.99028	7.93542	9.04306	9.45139	9.70764	8.85625	9.33403	9.56597	9.77083
2020-10-10	7.27292	8.81528	9.06319	9.61319	7.68542	8.90556	9.33542	9.71111	8.60764	9.18958	9.41111	9.60069
2020-10-11	6.73542	8.86628	9.10595	8.77108	7.13958	9.00465	9.43333	9.80482	8.23333	9.2	9.4	9.71446

## Sheet: Soil water content
	0-10 cm				10-20 cm				20-40 cm
Date	ND	SD	MD	HD	ND	SD	MD	HD	ND	SD	MD	HD
2020-06-20	0.39112	0.37844	0.23098	0.2454	0.46606	0.35106	0.23711	0.08752	0.38558	0.33113	0.17632	0.10433
2020-06-21	0.3737	0.38286	0.24647	0.2473	0.46376	0.35185	0.24063	0.0872	0.38589	0.33073	0.16932	0.10434
2020-06-22	0.36642	0.38995	0.28688	0.25074	0.46902	0.35254	0.24922	0.08698	0.3845	0.32875	0.15902	0.10439
2020-06-23	0.35887	0.38238	0.27469	0.2477	0.46886	0.35119	0.24399	0.08757	0.38409	0.33007	0.15796	0.10524
2020-06-24	0.53648	0.37817	0.25358	0.24447	0.47289	0.35005	0.23815	0.0877	0.37421	0.33001	0.15866	0.10574
2020-06-25	0.49897	0.37554	0.23806	0.24224	0.47252	0.34971	0.23434	0.08741	0.3668	0.33174	0.15983	0.10564
2020-06-26	0.48771	0.39044	0.2823	0.25042	0.47014	0.3536	0.24891	0.08679	0.36351	0.33685	0.16691	0.10562
2020-06-27	0.46699	0.37909	0.26534	0.24632	0.46942	0.35065	0.2432	0.08782	0.36079	0.33703	0.16368	0.10498
2020-06-28	0.44433	0.38068	0.26896	0.24719	0.46761	0.3498	0.24547	0.08818	0.36165	0.33785	0.15858	0.10444
2020-06-29	0.39418	0.37479	0.25428	0.24468	0.46899	0.3476	0.24125	0.08886	0.36133	0.33732	0.15911	0.10431
2020-06-30	0.38933	0.37668	0.24637	0.24483	0.46336	0.34798	0.23975	0.08869	0.36072	0.33624	0.15822	0.10463
2020-07-01	0.52732	0.40146	0.30435	0.25651	0.45857	0.35337	0.26654	0.09119	0.35892	0.33399	0.13615	0.10432
2020-07-02	0.49577	0.37946	0.27119	0.24776	0.4563	0.34942	0.2508	0.09068	0.35755	0.33134	0.13845	0.10432
2020-07-03	0.46414	0.37837	0.25802	0.24583	0.45548	0.34945	0.24601	0.0899	0.35639	0.3298	0.13653	0.10425
2020-07-04	0.47296	0.37794	0.25355	0.24542	0.4525	0.34919	0.24439	0.08916	0.35561	0.32821	0.12852	0.10431
2020-07-05	0.45579	0.37842	0.24709	0.24499	0.45193	0.34825	0.24325	0.08876	0.35699	0.32965	0.12275	0.10315
2020-07-06	0.44911	0.37828	0.24701	0.24482	0.43649	0.34829	0.24371	0.08803	0.35716	0.32861	0.1209	0.10315
2020-07-07	0.44287	0.37561	0.23477	0.24278	0.41752	0.34813	0.24018	0.08838	0.35472	0.32751	0.11896	0.10397
2020-07-08	0.43728	0.37763	0.22954	0.24334	0.41536	0.34857	0.24115	0.08814	0.35351	0.3236	0.12179	0.10365
2020-07-09	0.43452	0.39697	0.27822	0.25114	0.4195	0.34882	0.2566	0.08754	0.35177	0.33041	0.11668	0.10287
2020-07-10	0.44522	0.39281	0.28112	0.24896	0.45479	0.34734	0.2541	0.08869	0.35096	0.34147	0.11772	0.10287
2020-07-11	0.43712	0.3943	0.28659	0.24941	0.42892	0.34874	0.25526	0.08975	0.34971	0.34013	0.11778	0.10287
2020-07-12	0.42858	0.38689	0.27486	0.24717	0.4145	0.34855	0.25097	0.08995	0.34995	0.33764	0.11319	0.10287
2020-07-13	0.4238	0.38103	0.2629	0.2456	0.4124	0.3477	0.24742	0.08985	0.34929	0.3357	0.11251	0.103
2020-07-14	0.42265	0.39898	0.30909	0.25181	0.41307	0.34948	0.26022	0.09111	0.35131	0.33479	0.11921	0.10394
2020-07-15	0.42297	0.3891	0.31131	0.24716	0.41312	0.34684	0.25312	0.09168	0.35119	0.33378	0.11216	0.10528
2020-07-16	0.42011	0.38863	0.30823	0.24609	0.41038	0.34535	0.25095	0.09134	0.35045	0.33216	0.11784	0.10609
2020-07-17	0.41925	0.38274	0.29894	0.24469	0.41035	0.34536	0.24814	0.09057	0.35057	0.33044	0.1185	0.10705
2020-07-18	0.41715	0.40439	0.31431	0.26123	0.41016	0.34891	0.28115	0.09242	0.35132	0.32993	0.11607	0.10707
2020-07-19	0.41332	0.3973	0.30967	0.25233	0.40717	0.34797	0.26785	0.0925	0.35205	0.33171	0.12768	0.10927
2020-07-20	0.40988	0.39313	0.30515	0.24953	0.40504	0.34711	0.26113	0.0913	0.3524	0.3405	0.12437	0.11119
2020-07-21	0.40736	0.39251	0.30725	0.24963	0.4034	0.34744	0.26169	0.09118	0.35274	0.34262	0.15261	0.1093
2020-07-22	0.40408	0.38868	0.29717	0.2475	0.40054	0.34704	0.25705	0.09082	0.35304	0.34326	0.15656	0.10885
2020-07-23	0.40656	0.38734	0.29011	0.2462	0.41026	0.34615	0.25407	0.08976	0.35339	0.34221	0.13939	0.10971
2020-07-24	0.40686	0.40361	0.31941	0.25928	0.40452	0.34575	0.27546	0.09222	0.35377	0.34458	0.14314	0.10975
2020-07-25	0.40364	0.40867	0.33385	0.27431	0.40127	0.34412	0.31086	0.09704	0.379456	0.334129	0.155396	0.111401
2020-07-26	0.50894	0.40967	0.31152	0.26169	0.4665	0.3451	0.29857	0.09324	0.378374	0.333076	0.162924	0.104959
2020-07-27	0.45384	0.40893	0.29968	0.25847	0.45702	0.34344	0.29042	0.09205	0.377939	0.333684	0.153412	0.103088
2020-07-28	0.42154	0.40764	0.29521	0.25912	0.41658	0.34246	0.29007	0.09138	0.378423	0.334088	0.152904	0.102819
2020-07-29	0.41385	0.40657	0.30628	0.25995	0.4088	0.3424	0.29359	0.09235	0.378281	0.334971	0.155929	0.104094
2020-07-30	0.40828	0.40532	0.29916	0.25745	0.40544	0.34127	0.2893	0.09184	0.375607	0.3357	0.152415	0.103338
2020-07-31	0.40506	0.40351	0.29083	0.25608	0.40457	0.34021	0.28632	0.09116	0.377632	0.334944	0.150579	0.102941
2020-08-01	0.40228	0.40284	0.30961	0.26469	0.4024	0.33957	0.29971	0.09263	0.396967	0.332862	0.15938	0.104227
2020-08-02	0.40027	0.40227	0.30241	0.25953	0.40113	0.33918	0.29362	0.09291	0.392815	0.338005	0.156408	0.104835
2020-08-03	0.39916	0.40101	0.2942	0.26073	0.39929	0.339	0.29271	0.09198	0.394299	0.342331	0.15757	0.104318
2020-08-04	0.39996	0.39979	0.32133	0.27233	0.39875	0.33723	0.31117	0.09495	0.386894	0.343826	0.1284	0.108993
2020-08-05	0.40031	0.39735	0.31445	0.26762	0.40014	0.33522	0.30936	0.09503	0.381028	0.34395	0.128928	0.109699
2020-08-06	0.40418	0.395	0.31002	0.26599	0.41415	0.33333	0.30644	0.09439	0.398975	0.340696	0.129946	0.108634
2020-08-07	0.41702	0.39328	0.31332	0.26748	0.41274	0.33295	0.30851	0.09537	0.389099	0.338424	0.162582	0.109179
2020-08-08	0.44152	0.39102	0.29984	0.26489	0.43395	0.33244	0.30412	0.09464	0.38863	0.335354	0.173179	0.107589
2020-08-09	0.40395	0.38871	0.28881	0.26375	0.401	0.33119	0.3016	0.09398	0.382743	0.332474	0.16971	0.106217
2020-08-10	0.46161	0.38747	0.28182	0.26581	0.44062	0.33107	0.30264	0.09303	0.404388	0.331797	0.168828	0.105532
2020-08-11	0.41306	0.38768	0.31352	0.27209	0.41179	0.33154	0.31262	0.09598	0.3973	0.331475	0.168534	0.106639
2020-08-12	0.40862	0.38774	0.31472	0.26973	0.407	0.33031	0.31141	0.09605	0.39313	0.329706	0.167029	0.108837
2020-08-13	0.40481	0.38678	0.30283	0.26702	0.40256	0.32971	0.30822	0.09548	0.392514	0.330879	0.16699	0.108837
2020-08-14	0.40107	0.3855	0.29593	0.26606	0.40152	0.32839	0.30677	0.09452	0.388676	0.330962	0.166587	0.107811
2020-08-15	0.40397	0.38559	0.29652	0.26644	0.40797	0.329	0.30682	0.09381	0.387343	0.331541	0.166042	0.106838
2020-08-16	0.40641	0.38588	0.30393	0.26723	0.40907	0.3295	0.30787	0.09382	0.403607	0.331875	0.168914	0.105774
2020-08-17	0.40202	0.38451	0.31929	0.27798	0.40046	0.32933	0.33617	0.09556	0.408669	0.331016	0.166764	0.105631
2020-08-18	0.39794	0.38394	0.31406	0.27452	0.40752	0.33101	0.31268	0.09585	0.409672	0.333712	0.165016	0.107489
2020-08-19	0.44184	0.37402	0.29882	0.2705	0.45113	0.32958	0.31313	0.09487	0.408926	0.334309	0.16395	0.108764
2020-08-20	0.39969	0.36669	0.28829	0.26864	0.40003	0.3288	0.31177	0.09397	0.407644	0.332892	0.162791	0.107169
2020-08-21	0.39943	0.36347	0.27912	0.26751	0.4031	0.32835	0.31079	0.09337	0.406565	0.331952	0.162239	0.106542
2020-08-22	0.46023	0.36076	0.27861	0.26759	0.44104	0.32811	0.31091	0.09314	0.405316	0.332655	0.162007	0.105841
2020-08-23	0.40401	0.36166	0.29945	0.27155	0.40582	0.32815	0.31335	0.09309	0.403506	0.331556	0.167112	0.105745
2020-08-24	0.39762	0.3613	0.29762	0.26906	0.39715	0.32864	0.31231	0.09386	0.40284	0.333414	0.164123	0.105631
2020-08-25	0.49455	0.36072	0.28443	0.26754	0.39667	0.32845	0.31047	0.09305	0.402272	0.331804	0.162102	0.105631
2020-08-26	0.39845	0.35889	0.27363	0.26662	0.40429	0.32851	0.30918	0.09205	0.401008	0.332019	0.162302	0.105586
2020-08-27	0.39769	0.35753	0.26605	0.26607	0.40625	0.32835	0.30832	0.09115	0.399788	0.331717	0.162274	0.104909
2020-08-28	0.42669	0.35637	0.25861	0.26533	0.42056	0.32836	0.30725	0.09045	0.397355	0.331202	0.161666	0.104858
2020-08-29	0.41156	0.35563	0.25886	0.26819	0.43155	0.32857	0.31081	0.08974	0.395003	0.331457	0.161061	0.104752
2020-08-30	0.40077	0.35702	0.31732	0.28496	0.40447	0.32931	0.34979	0.09572	0.393276	0.332588	0.164072	0.104727
2020-08-31	0.39774	0.35713	0.30496	0.27465	0.40056	0.32948	0.31366	0.09497	0.391018	0.332538	0.162714	0.109354
2020-09-01	0.39798	0.35469	0.29501	0.2717	0.40149	0.32841	0.31291	0.09459	0.388714	0.332359	0.163316	0.108758
2020-09-02	0.3953	0.35345	0.28283	0.26953	0.39792	0.32814	0.31143	0.09383	0.387475	0.330941	0.169209	0.108027
2020-09-03	0.40216	0.35177	0.27263	0.26831	0.41327	0.32811	0.31019	0.09292	0.388245	0.330232	0.175086	0.107204
2020-09-04	0.39972	0.3509	0.26372	0.26733	0.40435	0.32809	0.30916	0.09189	0.38774	0.330528	0.172168	0.106857
2020-09-05	0.47537	0.34975	0.265	0.26807	0.4437	0.32824	0.3098	0.09095	0.386795	0.331048	0.166158	0.106287
2020-09-06	0.40788	0.34993	0.26989	0.26778	0.42483	0.32938	0.3095	0.09078	0.385506	0.330459	0.161814	0.105579
2020-09-07	0.40254	0.34927	0.26348	0.26662	0.40711	0.32941	0.3083	0.09062	0.385583	0.331135	0.176318	0.104327
2020-09-08	0.39854	0.35141	0.26224	0.2664	0.40213	0.32918	0.30789	0.09	0.385889	0.330727	0.169317	0.104337
2020-09-09	0.39588	0.35114	0.26274	0.26623	0.3994	0.32894	0.30766	0.08982	0.384504	0.328753	0.159018	0.104388
2020-09-10	0.39453	0.35045	0.25997	0.26589	0.39821	0.32959	0.30691	0.0895	0.384093	0.330066	0.157959	0.105238
2020-09-11	0.39287	0.35058	0.26151	0.26592	0.39677	0.32946	0.30688	0.089	0.374206	0.330013	0.158664	0.105742
2020-09-12	0.39244	0.35132	0.26148	0.26574	0.39708	0.33027	0.30643	0.08909	0.366798	0.331737	0.159829	0.105637
2020-09-13	0.39206	0.35207	0.26155	0.26561	0.39789	0.33107	0.30622	0.08873	0.363512	0.336848	0.166906	0.105618
2020-09-14	0.42292	0.35241	0.26836	0.26668	0.38248	0.3315	0.30758	0.0889	0.360787	0.337025	0.163685	0.104979
2020-09-15	0.40619	0.35273	0.27038	0.2659	0.43155	0.33211	0.30668	0.08928	0.361651	0.33785	0.158576	0.104442
2020-09-16	0.41445	0.35309	0.26562	0.26553	0.42475	0.33222	0.30549	0.08913	0.361329	0.337325	0.159113	0.104315
2020-09-17	0.39471	0.35339	0.26254	0.26558	0.42705	0.33311	0.30486	0.08845	0.360724	0.336244	0.158219	0.104634
2020-09-18	0.4086	0.35377	0.25596	0.26515	0.4297	0.33347	0.304	0.08776	0.358921	0.333992	0.136151	0.104321
2020-09-19	0.40731	0.35355	0.2513	0.26451	0.42197	0.33333	0.30319	0.08716	0.357553	0.331338	0.138453	0.104318
2020-09-20	0.38862	0.35175	0.24705	0.26416	0.40136	0.3325	0.30257	0.08726	0.356393	0.329801	0.136531	0.104251
2020-09-21	0.38093	0.3514	0.26463	0.2677	0.3732	0.33222	0.30663	0.08771	0.355607	0.328209	0.128518	0.104311
2020-09-22	0.4069	0.3516	0.27157	0.26618	0.36849	0.33256	0.3048	0.08836	0.356991	0.329654	0.12275	0.103149
2020-09-23	0.40646	0.35162	0.26393	0.26525	0.36888	0.33256	0.30317	0.08843	0.357162	0.328612	0.120903	0.103152
2020-09-24	0.37118	0.35259	0.26376	0.26586	0.39173	0.33319	0.30352	0.08777	0.35472	0.327514	0.118959	0.103972
2020-09-25	0.39117	0.35309	0.27057	0.26612	0.40309	0.33358	0.3039	0.08769	0.353506	0.323596	0.121792	0.103646
2020-09-26	0.38185	0.3533	0.26938	0.26581	0.40316	0.33493	0.30326	0.08766	0.351775	0.330412	0.116682	0.102867
2020-09-27	0.36818	0.35414	0.26549	0.26541	0.40445	0.33622	0.30262	0.08746	0.350962	0.341472	0.117723	0.102867
2020-09-28	0.38222	0.35338	0.27945	0.26721	0.39794	0.33504	0.30514	0.08819	0.349705	0.340131	0.117783	0.102867
2020-09-29	0.37131	0.35369	0.28187	0.26625	0.3804	0.33455	0.30384	0.08912	0.34995	0.337641	0.11319	0.102867
2020-09-30	0.36114	0.35408	0.28398	0.2668	0.37727	0.33623	0.30437	0.08952	0.349288	0.335698	0.112509	0.102995
2020-10-01	0.37098	0.35443	0.29856	0.26987	0.37263	0.33476	0.30748	0.09105	0.35131	0.334788	0.119209	0.103943
2020-10-02	0.37097	0.35589	0.30797	0.2701	0.37396	0.33415	0.30806	0.09268	0.351191	0.333782	0.112156	0.105283
2020-10-03	0.36094	0.35605	0.30699	0.26887	0.37398	0.33519	0.30701	0.09278	0.350452	0.332162	0.117838	0.106093
2020-10-04	0.36102	0.35789	0.3094	0.26934	0.37548	0.33563	0.30736	0.09272	0.350571	0.330441	0.118501	0.107052
2020-10-05	0.37308	0.35749	0.31742	0.27221	0.41295	0.33605	0.31055	0.09404	0.351318	0.329932	0.116072	0.107074
2020-10-06	0.42851	0.35793	0.31959	0.27326	0.42811	0.33628	0.31194	0.09474	0.352055	0.331712	0.127679	0.109268
2020-10-07	0.3446	0.35911	0.30282	0.27063	0.42752	0.33737	0.30963	0.09342	0.352399	0.340498	0.124374	0.111189
2020-10-08	0.34285	0.35824	0.30869	0.27232	0.42732	0.33673	0.31118	0.09355	0.35274	0.342617	0.15261	0.109297
2020-10-09	0.30867	0.35792	0.31519	0.27323	0.43094	0.33659	0.312	0.09404	0.353041	0.343259	0.256561	0.10885
2020-10-10	0.34032	0.35787	0.31015	0.27226	0.43212	0.33686	0.31114	0.09391	0.353394	0.342213	0.139388	0.109715
2020-10-11	0.32982	0.35868	0.31104	0.27352	0.42829	0.33218	0.31127	0.0939	0.353772	0.344582	0.143138	0.10975
